# Supplementary material for: Taxonomic Composition and Diversity of the Gut Microbiota in Relation to Habitual Dietary Intake in Korean Adults
Source: MDPI journal article supplement (doi:10.3390/nu13020366), 2021-01-26

## Supplementary material

**Article title:** Taxonomic Composition and Diversity of the Gut Microbiota in Relation to Habitual Dietary Intake in Korean Adults

**Journal name:** Nutrients

**Hwayoung Noh** <sup>1,2,†</sup>, **Hwan-Hee Jang** <sup>3,†</sup>, **Gichang Kim** <sup>3</sup>, **Semi Zouiouich** <sup>1</sup>, **Su-Yeon Cho** <sup>3</sup>, **Hyeon-Jeong Kim** <sup>3</sup>, **Jeongseon Kim** <sup>4</sup>, **Jeong-Sook Choe** <sup>3</sup>, **Marc J. Gunter** <sup>1</sup>, **Pietro Ferrari** <sup>1</sup>, **Augustin Scalbert** <sup>1</sup> and **Heinz Freisling** <sup>1,\*</sup>

<sup>1</sup> Section of Nutrition and Metabolism, International Agency for Research on Cancer (IARC-WHO), 69008 Lyon, France; hwayoung.noh@inserm.fr (H.N.); ZouiouichS@students.iarc.fr (S.Z.); GunterM@iarc.fr (M.J.G.); FerrariP@iarc.fr (P.F.); ScalbertA@iarc.fr (A.S.)

<sup>2</sup> Department of Cancer Prevention and Environment, INSERM UA8, Léon Bérard Cancer Center, 69003 Lyon, France

<sup>3</sup> National Institute of Agricultural Sciences, Rural Development Administration (NAS-RDA), Wanju, Jeollabuk-do 55365, Korea; rapture19@korea.kr (H.-H.J.); recall@korea.kr (G.K.); 0727jsy@naver.com (S.-Y.C.); mamimumemo14@hanmail.net (H.-J.K.); swany@korea.kr (J.-S.C.)

<sup>4</sup> Department of Cancer Biomedical Science, Graduate School of Cancer Science and Policy, National Cancer Center, Goyang, Gyeonggi-do 10408, Korea; jskim@ncc.re.kr

\* Correspondence: FreislingH@iarc.fr; Tel.: +33-472-738-664

† These authors equally contributed to this work.

This document contains the following items:

**Table S1:** Food group classification

**Table S2:** Difference of relative abundance (% OTU) of four major phyla and *Firmicutes*-to-*Bacteroidetes* (*F/B*) ratio by general characteristic and lifestyle factors of Korean adults of the NAS-IARC cross-sectional study (n=222 participants)

**Table S3:** Associations of within-subject ( $\alpha$ -) and between-subject ( $\beta$ -) diversity of the gut microbiota with general characteristics and lifestyle factors of Korean adults of the NAS-IARC cross-sectional study (n=222 participants)

**Table S4:** Spearman correlations between the within-subject ( $\alpha$ -) diversity of the gut microbiota and dietary intake of foods and nutrients in Korean adults of the NAS-IARC cross-sectional study (n=222 participants)

**Table S5:** Factor loadings of each food group for high  $\alpha$ -diversity dietary patterns (Hi $\alpha$ DPs) based on three  $\alpha$ -diversity indices in Korean adults of the NAS-IARC cross-sectional study (n=222 participants)

**Table S6:** Spearman correlations between the high  $\alpha$ -diversity dietary pattern (Hi $\alpha$ DP) and the relative abundance of *Firmicutes* and its genera in Korean adults of the NAS-IARC cross-sectional study (n=222 participants)

**Table S7:** Spearman correlations between intakes of main contributing food groups of the high  $\alpha$ -diversity dietary pattern (Hi $\alpha$ DP) and the relative abundance of genera within the *Bacteroidetes* and *Firmicutes* in Korean adults of the NAS-IARC cross-sectional study (n=222 participants).

**Table S8:** General characteristics and lifestyle factors by enterotypes in Korean adults of the NAS-IARC cross-sectional study (n=222 participants)

**Figure S1:** Plots to select optimal numbers of clusters with Elbow, Silhouette, and Gap statistic methods on k-means clustering for identifying enterotypes based on unweighted and weighted UniFrac, and Bray-Curtis distance matrices.

**Figure S2:** Enterotypes of gut microbiota in Korean adults of the NAS-IARC cross-sectional study (n=222 participants) based on unweighted UniFrac.

**Table S1.** Food group classification

| <b>Food groups</b>           | <b>Food items</b>                                 |
|------------------------------|---------------------------------------------------|
| Potatoes                     | Potato and sweet potato                           |
| Vegetables                   | Vegetable, vegetable juice, and mushrooms         |
| Fermented vegetables         | Kimchi and pickled vegetables                     |
| Seaweeds                     | laver, sea mustard, and kelp                      |
| Legumes                      | Legumes and their products (e.g. tofu, soy milk)  |
| Fermented legumes            | Fermented soybeans                                |
| Fruit/Fruit juice            | Fresh or canned fruit and fruit juice             |
| Nuts/Seeds                   | Almond, peanuts, sesame, etc.                     |
| Dairy products               | Milk, cheese, ice creams, etc.                    |
| Refined grains               | Refined rice                                      |
| Multi/Whole grains           | Whole-grain rice and other grains                 |
| Other cereal products        | Noodle, rice cakes (non-sweet), breakfast cereals |
| Meats                        | Beef, pork, poultry, etc.                         |
| Processed meats              | Ham and sausage                                   |
| Fish/Seashells               | Fish, coleoids, shellfish, etc                    |
| Eggs                         | Chicken/Quail eggs                                |
| Vegetable oils               | Corn oil, sesame oil, etc.                        |
| Other fats                   | Butter, margarine, etc.                           |
| Sugar/Confectionary          | Sugar, honey, jam                                 |
| Cakes/Sweets                 | Cakes, rice cakes (sweet), pie, sweet biscuits    |
| Coffee                       | Coffee                                            |
| Tea                          | Green tea                                         |
| Other non-alcoholic beverage | Carbonated or sweet beverages                     |
| Pizza/burgers                | Pizza and burgers                                 |
| Salty snacks                 | Chips and salty biscuits                          |

**Table S2.** Difference of relative abundance (% OTU) of four major phyla and *Firmicutes-to-Bacteroidetes* (*F/B*) ratio by general characteristics and lifestyle factors of Korean adults of the NAS-IARC cross-sectional study (n=222 participants)

|                                  | <i>Bacteroidetes</i> |                  | <i>Firmicutes</i> |                  | <i>Proteobacteria</i> |                  | <i>Actinobacteria</i> |                  | <i>F/B ratio</i> |                  |
|----------------------------------|----------------------|------------------|-------------------|------------------|-----------------------|------------------|-----------------------|------------------|------------------|------------------|
|                                  | Median               | IQR <sup>a</sup> | Median            | IQR <sup>a</sup> | Median                | IQR <sup>a</sup> | Median                | IQR <sup>a</sup> | Median           | IQR <sup>a</sup> |
| Total subjects (n=222)           | 54.2%                | 40.7-65.5%       | 37.6%             | 26.3-49.8%       | 3.8%                  | 1.9-7.4%         | 0.39%                 | 0.11-1.22%       | 0.68             | 0.41-1.22        |
| <i>Sex</i>                       |                      |                  |                   |                  |                       |                  |                       |                  |                  |                  |
| Men (n=108)                      | 54.3%                | 44.1-67.1%       | 32.8%             | 23.8-46.8%       | 5.1%                  | 2.8-10.7%        | 0.40%                 | 0.14-1.20%       | 0.61             | 0.35-1.07        |
| Women (n=114)                    | 54.1%                | 39.4-63.2%       | 39.8%             | 30.5-51.4%       | 3.0%                  | 1.5-5.5%         | 0.37%                 | 0.12-1.24%       | 0.73             | 0.48-1.31        |
| <i>p</i> -value <sup>b</sup>     |                      | 0.133            |                   | 0.009            |                       | <.001            |                       | 0.947            |                  | 0.024            |
| <i>Age group</i>                 |                      |                  |                   |                  |                       |                  |                       |                  |                  |                  |
| <40 years (n=175)                | 53.7%                | 41.3-65.9%       | 36.3%             | 25.3-49.1%       | 4.1%                  | 2.3-7.9%         | 0.42%                 | 0.14-1.17%       | 0.63             | 0.39-1.21        |
| ≥ 40 years (n=47)                | 54.8%                | 39.4-63.7%       | 39.9%             | 28.5-51.7%       | 2.9%                  | 1.4-5.7%         | 0.36%                 | 0.08-1.38%       | 0.74             | 0.48-1.31        |
| <i>p</i> -value <sup>b</sup>     |                      | 0.446            |                   | 0.128            |                       | 0.025            |                       | 0.921            |                  | 0.203            |
| <i>BMI group</i>                 |                      |                  |                   |                  |                       |                  |                       |                  |                  |                  |
| <23 kg/m <sup>2</sup> (n=128)    | 52.9%                | 40.8-62.9%       | 37.6%             | 26.8-50.5%       | 4.2%                  | 1.9-7.5%         | 0.38%                 | 0.09-1.27%       | 0.69             | 0.42-1.24        |
| ≥23 kg/m <sup>2</sup> (n=94)     | 56.2%                | 40.7-67.2%       | 37.5%             | 26.1-48.2%       | 3.6%                  | 1.9-6.6%         | 0.42%                 | 0.19-0.97%       | 0.64             | 0.39-1.16        |
| <i>p</i> -value <sup>b</sup>     |                      | 0.179            |                   | 0.507            |                       | 0.371            |                       | 0.938            |                  | 0.343            |
| <i>Dietary supplement intake</i> |                      |                  |                   |                  |                       |                  |                       |                  |                  |                  |
| Yes (n=76)                       | 54.9%                | 42.1-63.7%       | 37.7%             | 27.4-50.2%       | 2.8%                  | 1.3-5.9%         | 0.31%                 | 0.08-0.96%       | 0.67             | 0.43-1.23        |
| No (n=143)                       | 53.3%                | 40.5-66.1%       | 37.7%             | 26.0-50.1%       | 4.3%                  | 2.5-7.4%         | 0.51%                 | 0.19-1.22%       | 0.68             | 0.39-1.25        |
| <i>p</i> -value <sup>b</sup>     |                      | 0.926            |                   | 0.914            |                       | 0.015            |                       | 0.146            |                  | 0.972            |
| <i>Regular physical activity</i> |                      |                  |                   |                  |                       |                  |                       |                  |                  |                  |
| Yes (n=93)                       | 52.3%                | 39.4-63.8%       | 37.8%             | 28.2-50.1%       | 3.7%                  | 1.9-6.6%         | 0.39%                 | 0.10-1.16%       | 0.70             | 0.44-1.31        |
| No (n=129)                       | 55.7%                | 41.3-65.5%       | 36.5%             | 25.3-49.1%       | 4.0%                  | 2.2-7.4%         | 0.41%                 | 0.15-1.22%       | 0.65             | 0.38-1.16        |
| <i>p</i> -value <sup>b</sup>     |                      | 0.368            |                   | 0.415            |                       | 0.844            |                       | 0.411            |                  | 0.318            |
| <i>Smoking status</i>            |                      |                  |                   |                  |                       |                  |                       |                  |                  |                  |
| Ever (n=54)                      | 57.4%                | 47.8-69.9%       | 33.5%             | 23.8-45.9%       | 3.5%                  | 2.4-7.4%         | 0.37%                 | 0.12-1.17%       | 0.63             | 0.35-0.99        |
| Never (n=168)                    | 53.2%                | 39.1-63.5%       | 38.3%             | 27.7-51.1%       | 3.9%                  | 1.7-7.4%         | 0.42%                 | 0.13-1.25%       | 0.70             | 0.43-1.32        |
| <i>p</i> -value <sup>b</sup>     |                      | 0.017            |                   | 0.075            |                       | 0.873            |                       | 0.391            |                  | 0.040            |
| <i>Education</i>                 |                      |                  |                   |                  |                       |                  |                       |                  |                  |                  |
| <University graduation (n=110)   | 55.9%                | 40.2-65.9%       | 34.1%             | 26.1-48.2%       | 4.7%                  | 2.3-8.7%         | 0.50%                 | 0.19-0.99%       | 0.62             | 0.39-1.22        |
| ≥University graduation (n=113)   | 53.0%                | 42.0-64.9%       | 40.0%             | 27.2-50.5%       | 3.5%                  | 1.7-5.9%         | 0.33%                 | 0.10-1.28%       | 0.73             | 0.42-1.23        |
| <i>p</i> -value <sup>b</sup>     |                      | 0.893            |                   | 0.234            |                       | 0.067            |                       | 0.299            |                  | 0.401            |
| <i>Household Income</i>          |                      |                  |                   |                  |                       |                  |                       |                  |                  |                  |
| <4,000 USD/month (n=79)          | 53.0%                | 43.8-65.5%       | 35.9%             | 24.5-50.1%       | 3.7%                  | 1.5-5.9%         | 0.39%                 | 0.19-0.92%       | 0.64             | 0.39-1.19        |
| ≥4,000 USD/month (n=93)          | 55.3%                | 40.2-66.1%       | 37.9%             | 27.0-48.6%       | 3.4%                  | 1.8-6.6%         | 0.36%                 | 0.08-1.16%       | 0.68             | 0.39-1.23        |
| <i>p</i> -value <sup>b</sup>     |                      | 0.905            |                   | 0.649            |                       | 0.761            |                       | 0.690            |                  | 0.660            |

<sup>a</sup>. as interquartile range

<sup>b</sup>. The differences of % OTU of major four phyla and the *F/B* ratio by basic characteristic and lifestyle factors were examined by Wilcoxon-Mann-Whitney test

**Table S3.** Associations of within-subject ( $\alpha$ -) and between-subject ( $\beta$ -) diversity of the gut microbiota with general characteristics and lifestyle factors of Korean adults of the NAS-IARC cross-sectional study (n=222 participants)

|                           | $\alpha$ -diversity <sup>a,b</sup> |         |             |         |             |         | $\beta$ -diversity <sup>c</sup> |         |                  |         |             |         |
|---------------------------|------------------------------------|---------|-------------|---------|-------------|---------|---------------------------------|---------|------------------|---------|-------------|---------|
|                           | Chao1                              |         | Shannon     |         | Faith PD    |         | Unweighted UniFrac              |         | Weighted UniFrac |         | Bray-Curtis |         |
|                           | F statistic                        | p-value | F statistic | p-value | F statistic | p-value | F statistic                     | p-value | F statistic      | p-value | F statistic | p-value |
| Sex                       | 1.08                               | 0.300   | 6.99        | 0.009   | 3.33        | 0.069   | 2.25                            | 0.002   | 2.06             | 0.100   | 2.29        | 0.032   |
| Age group                 | 4.92                               | 0.028   | 10.38       | 0.002   | 10.47       | 0.001   | 2.70                            | 0.001   | 1.11             | 0.310   | 2.29        | 0.026   |
| BMI group                 | 0.26                               | 0.613   | 1.59        | 0.208   | 0.03        | 0.865   | 1.03                            | 0.326   | 3.14             | 0.026   | 2.66        | 0.007   |
| Dietary supplement intake | 0.28                               | 0.599   | 0.34        | 0.561   | 0.34        | 0.560   | 1.18                            | 0.165   | 0.40             | 0.783   | 1.12        | 0.314   |
| Physical activity         | 4.96                               | 0.027   | 1.33        | 0.250   | 5.11        | 0.025   | 1.39                            | 0.054   | 0.60             | 0.593   | 0.60        | 0.841   |
| Smoking status            | 0.02                               | 0.887   | 4.05        | 0.046   | 0.95        | 0.331   | 1.18                            | 0.148   | 2.90             | 0.047   | 2.00        | 0.045   |

Age group ( $\geq 40$  vs.  $<40$  years); BMI group ( $<23$  kg/m<sup>2</sup> vs.  $\geq 23$  kg/m<sup>2</sup>); Dietary supplement intake within 3 month (yes vs. no); Regular physical activity (yes vs. no); Smoking status (ever vs. never)

<sup>a</sup>The  $\alpha$ -diversity indices were log-transformed

<sup>b</sup>The statistical significance of associations of the  $\alpha$ -diversity with basic characteristic and lifestyle factors were tested by general linear models (GLM)

<sup>c</sup>The statistical significance of associations of the  $\beta$ -diversity with basic characteristic and lifestyle factors were tested by permutational multivariate analysis of variance (PERMANOVA)

**Table S4.** Spearman correlations<sup>a</sup> between the within-subject ( $\alpha$ -) diversity of the gut microbiota and dietary intake of foods and nutrients in Korean adults of the NAS-IARC cross-sectional study (n=222 participants)

|                                   | $\alpha$ -diversity <sup>b</sup> |                 |             |                 |             |                 |
|-----------------------------------|----------------------------------|-----------------|-------------|-----------------|-------------|-----------------|
|                                   | Chao1                            |                 | Shannon     |                 | Faith PD    |                 |
|                                   | Coefficient                      | <i>p</i> -value | Coefficient | <i>p</i> -value | Coefficient | <i>p</i> -value |
| <i>Food groups<sup>c</sup></i>    |                                  |                 |             |                 |             |                 |
| Potatoes                          | 0.04                             | 0.564           | 0.20        | 0.004           | 0.04        | 0.554           |
| Vegetables                        | 0.01                             | 0.897           | 0.20        | 0.004           | 0.01        | 0.879           |
| Fermented vegetables              | -0.03                            | 0.713           | 0.07        | 0.298           | -0.02       | 0.779           |
| Seaweeds                          | -0.09                            | 0.180           | 0.15        | 0.033           | -0.10       | 0.145           |
| Legumes                           | -0.05                            | 0.453           | 0.09        | 0.185           | -0.04       | 0.516           |
| Fermented legumes                 | 0.09                             | 0.214           | 0.20        | 0.003           | 0.10        | 0.150           |
| Fruit/Fruit juice                 | -0.06                            | 0.398           | 0.13        | 0.064           | -0.01       | 0.857           |
| Nuts/Seeds                        | 0.07                             | 0.339           | 0.13        | 0.054           | 0.06        | 0.415           |
| Dairy products                    | -0.04                            | 0.580           | 0.08        | 0.244           | -0.02       | 0.760           |
| Refined grains                    | -0.06                            | 0.382           | -0.05       | 0.467           | -0.08       | 0.236           |
| Multi/Whole grains                | 0.02                             | 0.781           | -0.01       | 0.849           | -0.01       | 0.895           |
| Other cereal products             | -0.08                            | 0.260           | -0.08       | 0.232           | -0.03       | 0.668           |
| Meats                             | 0.06                             | 0.385           | 0.04        | 0.546           | 0.03        | 0.655           |
| Processed meats                   | 0.02                             | 0.789           | -0.02       | 0.726           | 0.04        | 0.597           |
| Fish/Seashells                    | 0.05                             | 0.499           | 0.10        | 0.143           | 0.04        | 0.575           |
| Eggs                              | -0.04                            | 0.599           | 0.03        | 0.693           | -0.02       | 0.776           |
| Vegetable oils                    | 0.01                             | 0.851           | 0.08        | 0.268           | 0.05        | 0.429           |
| Other fats                        | 0.04                             | 0.566           | 0.04        | 0.597           | 0.00        | 0.951           |
| Sugar/Confectionary               | 0.04                             | 0.535           | 0.07        | 0.287           | 0.05        | 0.477           |
| Cakes/Sweets                      | -0.07                            | 0.341           | 0.06        | 0.412           | 0.00        | 0.981           |
| Coffee                            | 0.07                             | 0.313           | 0.07        | 0.283           | 0.03        | 0.638           |
| Tea                               | 0.14                             | 0.048           | 0.10        | 0.163           | 0.11        | 0.094           |
| Other non-alcoholic Bev.          | -0.02                            | 0.750           | -0.11       | 0.111           | -0.04       | 0.523           |
| Pizza/burgers                     | 0.01                             | 0.880           | 0.07        | 0.334           | 0.05        | 0.506           |
| Salty snacks                      | -0.04                            | 0.581           | 0.05        | 0.467           | -0.03       | 0.681           |
| <i>Macronutrients<sup>c</sup></i> |                                  |                 |             |                 |             |                 |
| Plant protein                     | 0.00                             | 0.950           | 0.13        | 0.065           | 0.02        | 0.736           |
| Animal protein                    | 0.04                             | 0.571           | 0.10        | 0.134           | 0.02        | 0.717           |
| Carbohydrate                      | -0.09                            | 0.171           | -0.02       | 0.784           | -0.10       | 0.144           |
| Dietary fiber                     | -0.03                            | 0.653           | 0.19        | 0.004           | 0.00        | 0.994           |
| Plant fat                         | 0.00                             | 0.969           | 0.06        | 0.401           | 0.03        | 0.618           |
| Animal fat                        | 0.03                             | 0.628           | 0.06        | 0.366           | 0.02        | 0.788           |
| SFA                               | 0.00                             | 0.991           | 0.04        | 0.522           | 0.00        | 0.982           |
| MUFA                              | 0.02                             | 0.736           | 0.05        | 0.497           | 0.01        | 0.842           |
| PUFA                              | 0.02                             | 0.799           | 0.10        | 0.147           | 0.04        | 0.514           |
| Alcohol                           | 0.02                             | 0.723           | 0.03        | 0.645           | 0.00        | 0.990           |

Faith PD, Faith's phylogenetic diversity

<sup>a</sup>Partial Spearman correlation analysis with adjustment for sex, age, BMI, dietary supplement intake, physical activity, smoking status, and batch effect

<sup>b</sup>The  $\alpha$ -diversity indices were log-transformed

<sup>c</sup>The intakes of food groups and macronutrients were log-transformed and adjusted for total energy intake using the residual method

**Table S5.** Factor loadings of each food group for high  $\alpha$ -diversity dietary patterns (Hi $\alpha$ DPs)<sup>a</sup> based on three  $\alpha$ -diversity indices in Korean adults of the NAS-IARC cross-sectional study (n=222 participants)

|                                                   | Hi $\alpha$ DPs    |                      |                       |
|---------------------------------------------------|--------------------|----------------------|-----------------------|
|                                                   | Chao1 <sup>b</sup> | Shannon <sup>b</sup> | Faith PD <sup>b</sup> |
| <i>Food groups<sup>c</sup></i>                    |                    |                      |                       |
| Fermented legumes                                 | 0.42               | 0.41                 | 0.38                  |
| Potatoes                                          | 0.23               | 0.33                 | 0.25                  |
| Vegetables                                        | 0.27               | 0.33                 | 0.24                  |
| Seaweeds                                          | -0.03              | 0.32                 | 0.00                  |
| Nuts/Seeds                                        | 0.36               | 0.26                 | 0.30                  |
| Tea                                               | 0.32               | 0.25                 | 0.29                  |
| Fruit/Fruit juice                                 | 0.03               | 0.24                 | 0.18                  |
| Cakes/Sweets                                      | -0.10              | 0.22                 | 0.03                  |
| Fish/Seashells                                    | 0.19               | 0.18                 | 0.18                  |
| Multi/Whole grains                                | 0.26               | 0.18                 | 0.25                  |
| Legumes                                           | -0.04              | 0.15                 | 0.03                  |
| Sugar/Confectionary                               | 0.13               | 0.14                 | 0.14                  |
| Fermented vegetables                              | -0.04              | 0.12                 | 0.03                  |
| Eggs                                              | 0.03               | 0.12                 | 0.10                  |
| Pizza/burgers                                     | 0.02               | 0.12                 | -0.04                 |
| Coffee                                            | 0.18               | 0.09                 | 0.22                  |
| Other fats                                        | -0.18              | 0.07                 | -0.21                 |
| Vegetable oils                                    | -0.06              | 0.05                 | -0.07                 |
| Dairy products                                    | 0.00               | 0.04                 | 0.05                  |
| Salty snacks                                      | -0.18              | 0.03                 | -0.10                 |
| Meats                                             | -0.14              | 0.01                 | -0.26                 |
| Refined grains                                    | -0.40              | -0.04                | -0.38                 |
| Processed meats                                   | 0.01               | -0.08                | -0.08                 |
| Other cereal products                             | -0.16              | -0.12                | -0.13                 |
| Other non-alcoholic beverages                     | -0.17              | -0.28                | -0.24                 |
| Explained variance (%)                            | 11.0%              | 15.1%                | 12.6%                 |
| Correlations with <i>F/B</i> ratio <sup>d,e</sup> | 0.08 (0.244)       | 0.24 (0.0004)        | 0.08 (0.222)          |

Faith PD, Faith's phylogenetic diversity

<sup>a</sup>Hi $\alpha$ DPs in the Korean adults were identified using three Reduced Rank Regression (RRR) models with the intakes of 25 food groups as predictor variables and each  $\alpha$ -diversity index (Chao1, Shannon, and Faith's phylogenetic diversity) as a response variable in a RRR model

<sup>b</sup>The  $\alpha$ -diversity indices were log-transformed

<sup>c</sup>The intakes of food groups were log-transformed and adjusted for total energy intake using the residual method

<sup>e</sup>The *F/B* ratio was centered log-ratio transformed

<sup>d</sup>Partial Spearman correlation coefficients (*p*-values) with the *F/B* ratio with sex, age, BMI, dietary supplement intake, physical activity, smoking status, and batch effect as covariates.

**Table S6.** Spearman correlations<sup>1</sup> between the high  $\alpha$ -diversity dietary pattern (Hi $\alpha$ DP)<sup>2</sup> and the relative abundance of *Firmicutes* and its genera in Korean adults of the NAS-IARC cross-sectional study (n=222 participants).

| Phylum            |             |                              | Genus                           |             |                              |                                             |
|-------------------|-------------|------------------------------|---------------------------------|-------------|------------------------------|---------------------------------------------|
| Taxa <sup>3</sup> | Coefficient | <i>p</i> -value <sup>4</sup> | Taxa <sup>3</sup>               | Coefficient | <i>p</i> -value <sup>4</sup> | <i>p</i> -value <sub>adj</sub> <sup>4</sup> |
| <i>Firmicutes</i> | 0.079       | 0.249                        | <i>Lactobacillus</i>            | 0.228       | 0.0007                       | 0.005                                       |
|                   |             |                              | <i>Ruminococcus</i>             | 0.214       | 0.002                        | 0.007                                       |
|                   |             |                              | <i>Eubacterium</i>              | 0.202       | 0.003                        | 0.008                                       |
|                   |             |                              | <i>Hydrogenoanaerobacterium</i> | -0.268      | 0.0001                       | 0.003                                       |
|                   |             |                              | <i>Desulfotomaculum</i>         | -0.257      | 0.0001                       | 0.003                                       |
|                   |             |                              | <i>Alkalibaculum</i>            | -0.249      | 0.0002                       | 0.003                                       |
|                   |             |                              | <i>Peptoniphilus</i>            | -0.248      | 0.0002                       | 0.003                                       |
|                   |             |                              | <i>Lactonifactor</i>            | -0.248      | 0.0002                       | 0.003                                       |
|                   |             |                              | <i>Acetivibrio</i>              | -0.247      | 0.0003                       | 0.003                                       |
|                   |             |                              | <i>Peptostreptococcus</i>       | -0.242      | 0.0003                       | 0.004                                       |
|                   |             |                              | <i>Pectinatus</i>               | -0.233      | 0.0006                       | 0.005                                       |
|                   |             |                              | <i>Cellulosilyticum</i>         | -0.229      | 0.0007                       | 0.005                                       |
|                   |             |                              | <i>Leuconostoc</i>              | -0.228      | 0.0007                       | 0.005                                       |
|                   |             |                              | <i>Subdoligranulum</i>          | -0.226      | 0.0009                       | 0.006                                       |
|                   |             |                              | <i>Papillibacter</i>            | -0.224      | 0.0009                       | 0.006                                       |
|                   |             |                              | <i>Staphylococcus</i>           | -0.223      | 0.0010                       | 0.006                                       |
|                   |             |                              | <i>Anaerococcus</i>             | -0.220      | 0.0011                       | 0.006                                       |
|                   |             |                              | <i>Succiniclasticum</i>         | -0.219      | 0.0012                       | 0.006                                       |
|                   |             |                              | <i>Acetitomaculum</i>           | -0.211      | 0.0019                       | 0.008                                       |
|                   |             |                              | <i>Anaerofilum</i>              | -0.210      | 0.0019                       | 0.008                                       |
|                   |             |                              | <i>Bacillus</i>                 | -0.209      | 0.0021                       | 0.008                                       |
|                   |             |                              | <i>Solobacterium</i>            | -0.207      | 0.0023                       | 0.008                                       |
|                   |             |                              | <i>Desulfonispora</i>           | -0.207      | 0.0023                       | 0.008                                       |
|                   |             |                              | <i>Anaerosporobacter</i>        | -0.207      | 0.0023                       | 0.008                                       |

|                           |        |        |       |
|---------------------------|--------|--------|-------|
| <i>Butyrivibrio</i>       | -0.206 | 0.0024 | 0.008 |
| <i>Pseudobutyrvibrio</i>  | -0.205 | 0.0025 | 0.008 |
| <i>Ethanoligenens</i>     | -0.204 | 0.0027 | 0.008 |
| <i>Erysipelothrix</i>     | -0.201 | 0.0030 | 0.008 |
| <i>Oribacterium</i>       | -0.200 | 0.0032 | 0.009 |
| <i>Enterococcus</i>       | -0.197 | 0.0038 | 0.010 |
| <i>Acidaminococcus</i>    | -0.194 | 0.0043 | 0.011 |
| <i>Catabacter</i>         | -0.191 | 0.0049 | 0.012 |
| <i>Propionispira</i>      | -0.188 | 0.0057 | 0.013 |
| <i>Gemella</i>            | -0.188 | 0.0057 | 0.013 |
| <i>Megamonas</i>          | -0.182 | 0.0074 | 0.017 |
| <i>Howardella</i>         | -0.180 | 0.0081 | 0.018 |
| <i>Lutispora</i>          | -0.180 | 0.0083 | 0.018 |
| <i>Allisonella</i>        | -0.178 | 0.0090 | 0.019 |
| <i>Lactococcus</i>        | -0.166 | 0.0150 | 0.031 |
| <i>Weissella</i>          | -0.163 | 0.0167 | 0.033 |
| <i>Peptococcus</i>        | -0.159 | 0.0200 | 0.039 |
| <i>Parasporobacterium</i> | -0.158 | 0.0206 | 0.039 |
| <i>Anaerovorax</i>        | -0.155 | 0.0233 | 0.043 |
| <i>Christensenella</i>    | -0.152 | 0.0258 | 0.047 |

---

<sup>1</sup> Partial Spearman correlation analysis adjusted for sex, age, BMI, dietary supplement intake, physical activity, smoking status, and sample batch; <sup>2</sup> The high  $\alpha$ -diversity dietary pattern (Hi $\alpha$ DP) based on the Shannon index from Reduced Rank Regression (RRR) analysis was characterized by high intakes of fermented legumes, vegetables, potatoes, seaweeds, nuts/seeds, and tea and low intake of non-alcoholic beverages (e.g. carbonated and sweet beverages); <sup>3</sup> The relative abundance of taxa was centered log-ratio transformed; <sup>4</sup> *P*-values before (*p*-value) and after (*p*-value<sub>adj</sub>) multiple comparison corrections using False Discovery Rate (FDR);

**Table S7.** Spearman correlations<sup>1</sup> between intakes of main contributing food groups<sup>2</sup> of the high  $\alpha$ -diversity dietary pattern (HiaDP)<sup>2</sup> and the relative abundance of genera within the *Bacteroidetes* and *Firmicutes* in Korean adults of the NAS-IARC cross-sectional study (n=222 participants).

| Food groups       | Genus                           | Coefficient | <i>p</i> -value <sup>4</sup> | <i>p</i> -value <sub>adj</sub> <sup>4</sup> |
|-------------------|---------------------------------|-------------|------------------------------|---------------------------------------------|
|                   | Taxa <sup>3</sup>               |             |                              |                                             |
| Fermented legumes | <i>Eubacterium</i>              | 0.205       | 0.003                        | 0.037                                       |
|                   | <i>Coenonia</i>                 | -0.224      | 0.001                        | 0.037                                       |
|                   | <i>Allisonella</i>              | -0.214      | 0.002                        | 0.037                                       |
|                   | <i>Lactonifactor</i>            | -0.211      | 0.002                        | 0.037                                       |
|                   | <i>Hydrogenoanaerobacterium</i> | -0.207      | 0.002                        | 0.037                                       |
|                   | <i>Pseudobutyrvibrio</i>        | -0.203      | 0.003                        | 0.037                                       |
|                   | <i>Peptoniphilus</i>            | -0.201      | 0.003                        | 0.037                                       |
| Vegetables        | <i>Lactobacillus</i>            | 0.227       | 0.0008                       | 0.070                                       |
| Potatoes          | <i>Eubacterium</i>              | 0.203       | 0.0028                       | 0.109                                       |
|                   | <i>Lactonifactor</i>            | -0.204      | 0.0026                       | 0.109                                       |
| Seaweeds          | <i>Megamonas</i>                | -0.273      | 0.0282                       | 0.132                                       |

<sup>1</sup> Partial Spearman correlation analysis adjusted for sex, age, BMI, dietary supplement intake, physical activity, smoking status, and sample batch; <sup>2</sup> The high  $\alpha$ -diversity dietary pattern (HiaDP) based on the Shannon index from Reduced Rank Regression (RRR) analysis and main contributing food groups of HiaDP were defined based on factor loadings (> 0.3); <sup>3</sup> The relative abundance of taxa was centered log-ratio transformed; <sup>4</sup> P-values before (*p*-value) and after (*p*-value<sub>adj</sub>) multiple comparison corrections using False Discovery Rate (FDR);

**Table S8.** General characteristics and lifestyle factors by three enterotypes in Korean adults of the NAS-IARC cross-sectional study (n=222 participants)

|                                       | Weighted UniFrac   |           |                    |           |                     |           |                              | Bray curtis        |       |                    |       |                     |       |                              |
|---------------------------------------|--------------------|-----------|--------------------|-----------|---------------------|-----------|------------------------------|--------------------|-------|--------------------|-------|---------------------|-------|------------------------------|
|                                       | <i>Provootella</i> |           | <i>Bacteroides</i> |           | <i>Ruminococcus</i> |           | <i>p</i> -value <sup>b</sup> | <i>Provootella</i> |       | <i>Bacteroides</i> |       | <i>Ruminococcus</i> |       | <i>p</i> -value <sup>b</sup> |
|                                       | (n=64, 28.8%)      |           | (n=81, 36.5%)      |           | (n=77, 34.7%)       |           |                              | (n=71, 25.7%)      |       | (n=57, 32.0%)      |       | (n=94, 42.3%)       |       |                              |
| Sex – men (n, %)                      | 32                 | 50.0%     | 43                 | 53.1%     | 33                  | 42.9%     | 0.42                         | 34                 | 47.9% | 32                 | 56.1% | 42                  | 44.7% | 0.39                         |
| Age (yr) <sup>a</sup>                 | 29.3               | 22.0-37.5 | 29.2               | 22-37     | 30.3                | 22-35     | 0.77                         | 30.4               | 42.7% | 27.0               | 47.3% | 30.6                | 32.6% | 0.08                         |
| BMI (kg/m <sup>2</sup> ) <sup>a</sup> | 23.3               | 21.0-24.9 | 23.1               | 21.1-24.5 | 22.4                | 20.6-24.2 | 0.12                         | 23.3               | 32.8% | 22.2               | 38.9% | 23.1                | 24.6% | 0.05                         |
| Dietary supplement – yes (n, %)       | 21                 | 32.8%     | 29                 | 35.8%     | 26                  | 33.8%     | 0.76                         | 24                 | 33.8% | 11                 | 19.3% | 41                  | 43.6% | 0.02                         |
| Physical activity – yes (n, %)        | 27                 | 42.2%     | 32                 | 39.5%     | 33                  | 42.9%     | 0.90                         | 29                 | 40.8% | 22                 | 38.6% | 41                  | 43.6% | 0.83                         |
| Smoking status – never (n, %)         | 44                 | 68.8%     | 60                 | 74.1%     | 64                  | 83.1%     | 0.13                         | 48                 | 67.6% | 42                 | 73.7% | 78                  | 83.0% | 0.07                         |

<sup>a</sup>. Mean and IQR (interquartile range)<sup>b</sup>. Differences in each variable among three enterotypes examined by general linear models (GLMs) for continuous variables (age and BMI) and by chi-square tests for categorical variables (sex, dietary supplement, physical activity, and smoking status)

**Figure S1.** Plots to select optimal numbers of clusters with (a) Elbow, (b) Silhouette, and (c) Gap statistic methods on k-means clustering for identifying enterotypes based on A) unweighted and B) weighted UniFrac, and C) Bray-Curtis distance matrices.

**A. Unweighted UniFrac (determined number of clusters =2)**

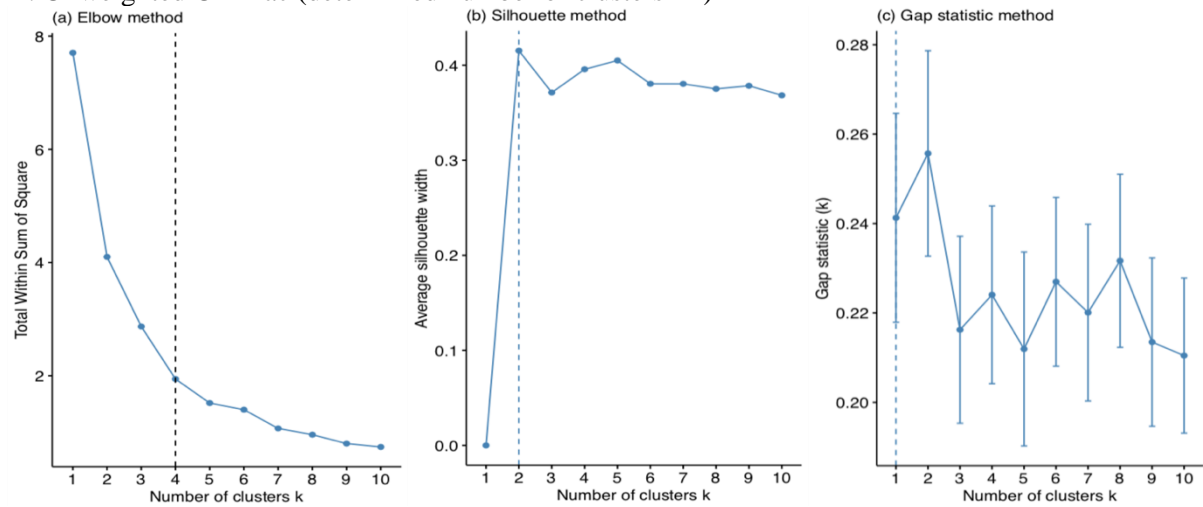

**B. Weighted UniFrac (determined number of clusters =3)**

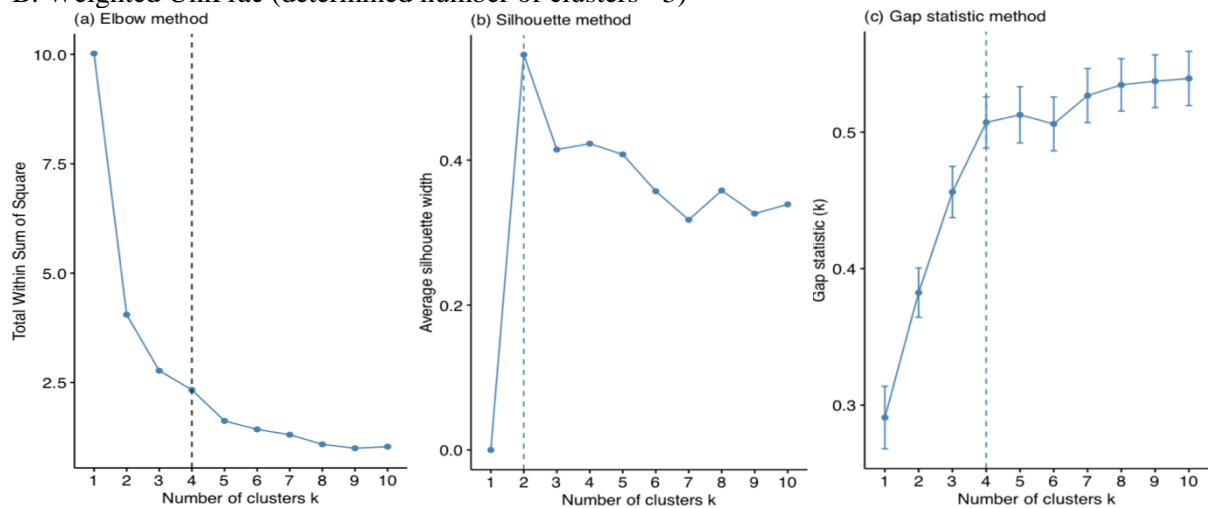

**C. Bray-Curtis (determined number of clusters =3)**

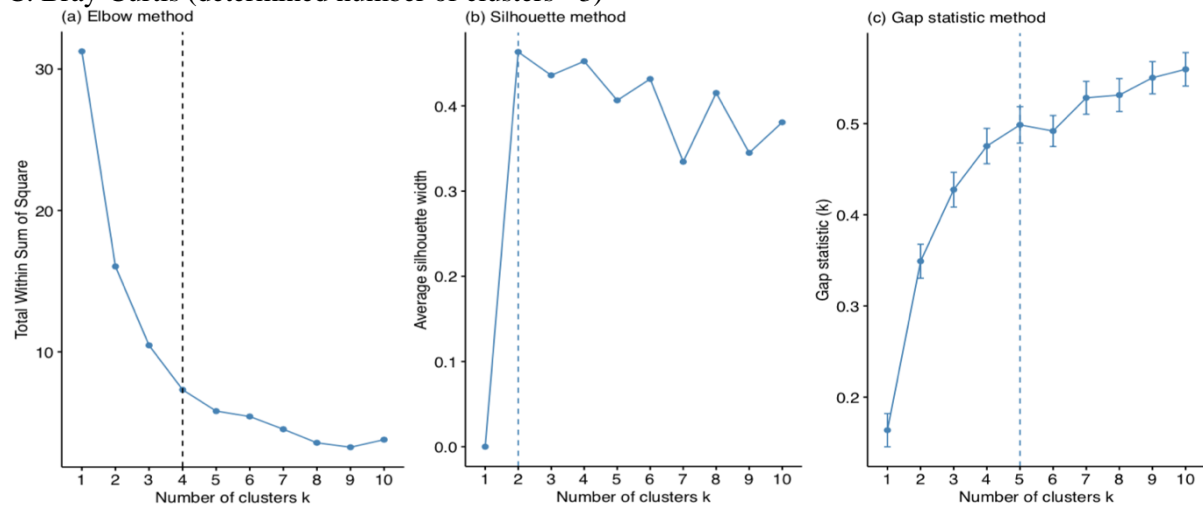

**Figure S2.** Enterotypes of gut microbiota in Korean adults of the NAS-IARC cross sectional study (n=222 participants) based on unweighted UniFrac. A. two enterotypes were identified by Principal Coordinates Analysis (PCoA) and k-means clustering based on unweighted UniFrac distance matrix ( $\beta$ -diversity) of gut microbiota in the Korean adults. B. dominant bacteria genus of each enterotype – *Bacteroides* and *Prevotella*.

A. Enterotypes based unweighted UniFrac

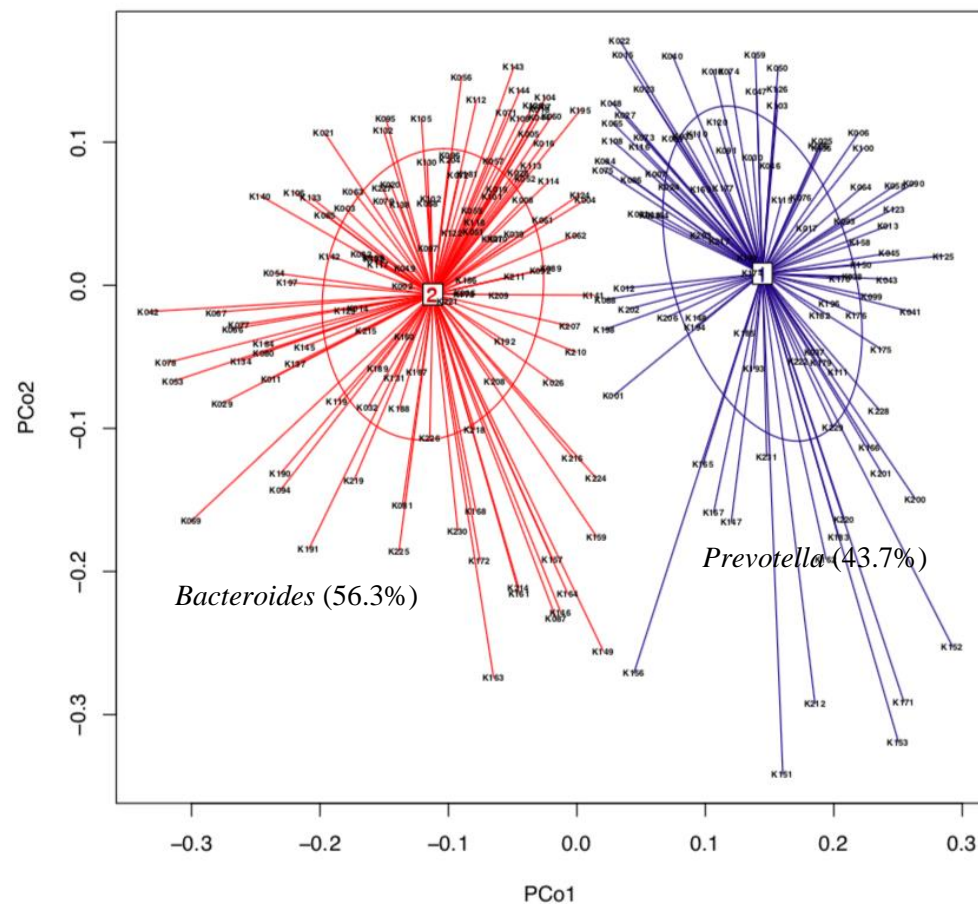

B. Dominant bacteria genus of each enterotype

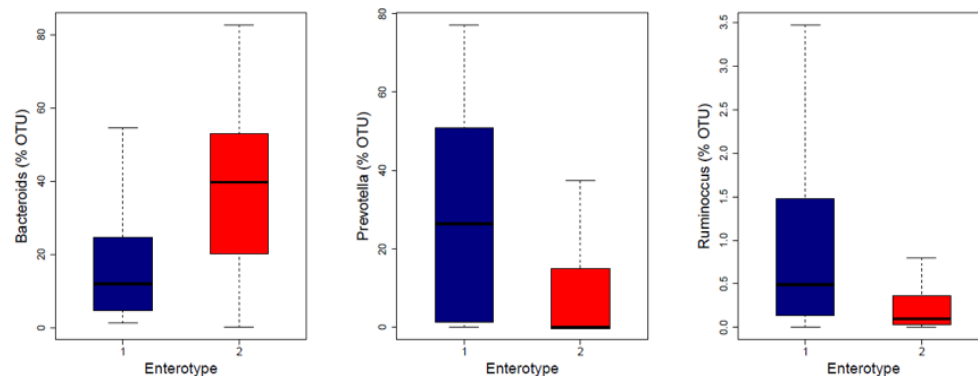

Supplement: s1 [file s1]
